# Supplementary material
Source: publisher site journal article supplement (https://www.dovepress.com/article/529171)
Supplement: Supplementary file 1 [file 529171-hospitalisations-paper-supplement.pdf]

**MAJOR ADVERSE CARDIOVASCULAR EVENTS AND CAUSE-SPECIFIC  
MORTALITY AFTER HOSPITALISATION IN COPD**

Anne E. Ioannides, Hannah R. Whittaker, Jennifer K. Quint

**ONLINE DATA SUPPLEMENT**

## Supplementary material contents

| Supplementary material items                                                                                                                                                                                                                                                                                                                                               | Page number  |
|----------------------------------------------------------------------------------------------------------------------------------------------------------------------------------------------------------------------------------------------------------------------------------------------------------------------------------------------------------------------------|--------------|
| CPRD: ADDITIONAL LINKAGE, DATA AVAILING, CONSENT FOR PUBLICATION AND ETHICS STATEMENTS, AND RESEARCH DATA QUALITY INFORMATION                                                                                                                                                                                                                                              | Pg. 2 to 3   |
| VARIABLE DEFINITIONS LIST                                                                                                                                                                                                                                                                                                                                                  | Pg. 4 to 6   |
| <b>Table E1:</b> Cohort baseline characteristics                                                                                                                                                                                                                                                                                                                           | Pg. 7 to 9   |
| <b>Table E2:</b> Risk of study outcomes amongst people with COPD who were hospitalised (study exposure group) compared with people who were not hospitalised (study control group) using different models to assess degree of confounding of indication through sensitivity models                                                                                         | Pg. 10       |
| <b>Table E3:</b> Risk of MACE* amongst people with COPD who were had an elective or emergency hospitalisation (study exposure groups) compared with people who were not hospitalised (study control group)                                                                                                                                                                 | Pg. 11       |
| <b>Table E4:</b> Risk of all-cause mortality amongst people with COPD who were had an elective or emergency hospitalisation (study exposure groups) compared with people who were not hospitalised (study control group)                                                                                                                                                   | Pg. 12       |
| <b>Table E5:</b> Risk of cardiovascular-specific mortality amongst people with COPD who were had an elective or emergency hospitalisation (study exposure groups) compared with people who were not hospitalised (study control group)                                                                                                                                     | Pg.13        |
| <b>Table E6:</b> Risk of COPD-specific mortality amongst people with COPD who were had an elective or emergency hospitalisation (study exposure groups) compared with people who were not hospitalised (study control group)                                                                                                                                               | Pg. 14       |
| <b>Table E7:</b> Descriptive statistics and rates of major adverse cardiovascular events (MACE) in people with COPD by hospitalisation group (not hospitalised; and hospitalised, stratified by hospitalisation type [emergency or elective] and cause [respiratory, cardiovascular, and non-cardiorespiratory])                                                           | Pg.15        |
| <b>Table E8:</b> Descriptive statistics and rates of all-cause mortality in people with COPD by hospitalisation group (not hospitalised; and hospitalised, stratified by hospitalisation type [emergency or elective] and cause [respiratory, cardiovascular, and non-cardiorespiratory])                                                                                  | Pg. 16       |
| <b>Table E9:</b> Descriptive statistics and rates of COPD-specific mortality in people with COPD by hospitalisation group (not hospitalised; and hospitalised, stratified by hospitalisation type [emergency or elective] and cause [respiratory, cardiovascular, and non-cardiorespiratory])                                                                              | Pg.17        |
| <b>Table E10:</b> Descriptive statistics and rates of cardiovascular disease-specific mortality in people with COPD by hospitalisation group (not hospitalised; and hospitalised, stratified by hospitalisation type [emergency or elective] and cause [respiratory, cardiovascular, and non-cardiorespiratory])                                                           | Pg. 18       |
| <b>Table E11:</b> Cause-specific mortality across people with COPD, stratified by hospitalisation cause (any, cardiovascular, respiratory, or non-cardiorespiratory), and sub-stratified by hospitalisation type (all, elective, or emergency), where number (percentages) by ICD10 chapter represent the proportion of people who died in each stratum and/or sub-stratum | Pg. 19 to 20 |

## **CPRD: ADDITIONAL LINKAGE, DATA AVAILING, CONSENT FOR PUBLICATION AND ETHICS STATEMENTS, AND RESEARCH DATA QUALITY INFORMATION**

### **Ethics approval and consent to participate:**

CPRD has NHS Health Research Authority (HRA) Research Ethics Committee (REC) approval to allow the collection and release of anonymised primary care data for observational research [NHS HRA REC reference number: 05/MRE04/87]. Each year CPRD obtains Section 251 regulatory support through the HRA Confidentiality Advisory Group (CAG), to enable patient identifiers, without accompanying clinical data, to flow from CPRD contributing GP practices in England to NHS Digital, for the purposes of data linkage [CAG reference number: 21/CAG/0008]. The protocol for this research was approved by CPRD's Research Data Governance (RDG) Process (protocol number: 22\_002514) and the approved protocol is available upon request. Linked pseudonymised data was provided for this study by CPRD. Data is linked by NHS Digital, the statutory trusted third party for linking data, using identifiable data held only by NHS Digital. Select general practices consent to this process at a practice level with individual patients having the right to opt-out.

### **Consent for publication, and availability of data and materials:**

Datasets generated and/or analysed in this study are not publicly available, however, data are available on request from the CPRD. Their provision requires the purchase of a license, and this license does not permit the authors to make them publicly available to all. This work used data from the version collected in February 2022 and has clearly specified the data selected in the Methods section. To allow identical data to be obtained by others, via the purchase of a license, the code lists will be provided upon request. Licenses are available from the CPRD (<http://www.cprd.com>): The Clinical Practice Research Datalink Group, The Medicines and Healthcare products Regulatory Agency, 10 South Colonnade, Canary Wharf, London E14 4PU.

### **Additional linkage information:**

Linked pseudonymised socioeconomic data from the Index of Multiple Deprivation (IMD), and secondary care data from Hospital Episode Statistics (HES) were provided for this study by CPRD for patients in England. Data is linked by NHS Digital, the statutory trusted third party for linking data, using identifiable data held only by NHS Digital. Select general practices consent to this process at a practice level, with individual patients having the right to opt-out. Use of HES and ONS data is Copyright © (2023), re-used with the permission of The Health & Social Care Information Centre

### **Data research quality information:**

CPRD checks several elements of data quality prior to making these data available for research (such as the volume of the data, data elements, and checks at different levels). Details on the data quality and the strategies undertaken by CPRD to ensure data quality are available at

<https://www.cprd.com/data-quality>. Moreover, Wolf et. al. (2019, doi: <https://doi.org/10.1093/ije/dyz034>) offers a data profile on CPRD data, including demographic information and population representation, linkage to other datasets, and data strengths and weaknesses.

## VARIABLE DEFINITIONS LIST

| Variable                                | Dataset location                          | Definition                                                                                                                              |
|-----------------------------------------|-------------------------------------------|-----------------------------------------------------------------------------------------------------------------------------------------|
| <b>EXPOSURE: HOSPITALISATION</b>        |                                           |                                                                                                                                         |
| <b>Hospitalisation (any)</b>            | HES APC (first position ICD10 codes only) | ICD10 code not considered                                                                                                               |
| <b>Elective</b>                         | HES APC                                   | Defined as elective according to HES dictionary, where admission record ('admimeth' is 11, 12m or 13).                                  |
| <b>Emergency</b>                        | HES APC                                   | Defined as emergency according to the HES dictionary, where admission record ('admimeth' is 21, 22, 23, 24, 25, 2A, 2B, 2C, 2D, or 28). |
| <b>Hospitalisation (cardiovascular)</b> | HES APC (first position ICD10 codes only) | Any ICD10 code from ICD chapter 9 (starting with "I-")                                                                                  |
| <b>Elective</b>                         | HES APC                                   | Defined as elective according to HES dictionary, where admission record ('admimeth' is 11, 12m or 13).                                  |
| <b>Emergency</b>                        | HES APC                                   | Defined as emergency according to the HES dictionary, where admission record ('admimeth' is 21, 22, 23, 24, 25, 2A, 2B, 2C, 2D, or 28). |
| <b>Hospitalisation (respiratory)</b>    | HES APC (first position ICD10 codes only) | Any ICD10 code from ICD chapter 10 (starting with "J-")                                                                                 |
| <b>Elective</b>                         | HES APC                                   | Defined as elective according to HES dictionary, where admission record ('admimeth' is 11, 12m or 13).                                  |
| <b>Emergency</b>                        | HES APC                                   | Defined as emergency according to the HES dictionary, where admission record ('admimeth' is 21, 22, 23, 24, 25, 2A, 2B, 2C, 2D, or 28). |
| <b>OUTCOME: MACE</b>                    |                                           |                                                                                                                                         |
| <b>Acute coronary syndrome</b>          | HES APC (first position ICD10 codes only) | Unstable angina<br>ST elevated myocardial infarction (STEMI)<br>Non-ST elevated myocardial infarction (non-STEMI)                       |
| <b>Arrhythmia</b>                       | HES APC (first position ICD10 codes only) | Atrial fibrillation / flutter<br>Cardiac arrest<br>Other arrhythmias                                                                    |
| <b>Heart failure</b>                    | HES APC (first position ICD10 codes only) | HFpEF<br>HFrEF<br>Decompensated HF<br>Acute pulmonary oedema<br>Dilated cardiomyopathy<br>Takotsubo cardiomyopathy                      |
| <b>Ischaemic stroke</b>                 | HES APC (first position ICD10 codes only) | Ischaemic stroke                                                                                                                        |
| <b>OUTCOME: MORTALITY</b>               | ONS record                                | Binary                                                                                                                                  |

|                                          |                                                                            |                                                                                                                                                                                                                                                                                                        |
|------------------------------------------|----------------------------------------------------------------------------|--------------------------------------------------------------------------------------------------------------------------------------------------------------------------------------------------------------------------------------------------------------------------------------------------------|
| <b>Cardiovascular-specific</b>           | ONS record (first position ICD10 code only)                                | Binary                                                                                                                                                                                                                                                                                                 |
| <b>COPD-specific</b>                     | ONS record (first position ICD10 code only)                                | Binary                                                                                                                                                                                                                                                                                                 |
| <b>COVARIATES</b>                        |                                                                            |                                                                                                                                                                                                                                                                                                        |
| <b>Age</b>                               | CPRD Aurum measured as the difference between index date and year of birth | Continuous variable                                                                                                                                                                                                                                                                                    |
| <b>Sex</b>                               | CPRD Aurum                                                                 | Male or female                                                                                                                                                                                                                                                                                         |
| <b>Socioeconomic status</b>              | Linked data – Index of Multiple Deprivation (IMD)                          | Index of Multiple Deprivation: Quintiled measurement of deprivation, ranging from 1 (most deprived) to 5 (least deprived)                                                                                                                                                                              |
| <b>Smoking status</b>                    | CPRD Aurum                                                                 | Ex-smoker or current smoker (most recent patient record)                                                                                                                                                                                                                                               |
| <b>Body Mass Index*</b>                  | CPRD Aurum                                                                 | BMI = weight (kg) / height <sup>2</sup> (m), most recent within the five years before start of follow-up<br>- Healthy weight (18.5 to 24.9 kg.m <sup>-2</sup> )<br>- Underweight (<18.5 kg.m <sup>-2</sup> )<br>- Overweight (25.0 to 29.9 kg.m <sup>-2</sup> )<br>- Obese (>30.0 kg.m <sup>-2</sup> ) |
| <b>Depression</b>                        | CPRD Aurum                                                                 | Binary; Any record prior to index date                                                                                                                                                                                                                                                                 |
| <b>Anxiety</b>                           | CPRD Aurum                                                                 | Binary; Any record prior to index date                                                                                                                                                                                                                                                                 |
| <b>Gastro-oesophageal reflux disease</b> | CPRD Aurum                                                                 | Binary; Any record prior to index date                                                                                                                                                                                                                                                                 |
| <b>Lung cancer</b>                       | CPRD Aurum                                                                 | Binary; Any record prior to index date                                                                                                                                                                                                                                                                 |
| <b>Hypertension</b>                      | CPRD Aurum                                                                 | Binary; Any record prior to index date                                                                                                                                                                                                                                                                 |
| <b>Type 2 diabetes mellitus</b>          | CPRD Aurum                                                                 | Binary; Any record prior to index date                                                                                                                                                                                                                                                                 |
| <b>Cardiovascular history</b>            | CPRD Aurum<br>HES APC                                                      | Binary<br>Record of:<br>- Acute coronary syndrome<br>- Arrhythmias<br>- Heart failure<br>- Ischaemic stroke<br>Any record prior to index date                                                                                                                                                          |
| <b>Asthma</b>                            | CPRD Aurum                                                                 | Binary<br>Any record prior to index date                                                                                                                                                                                                                                                               |
| <b>COPD exacerbation group</b>           | CPRD Aurum<br>HES APC                                                      | Defined as one of the following categories based on the year preceding index date:<br>- None<br>- 1 moderate, 0 severe<br>- 2 moderate, 0 severe                                                                                                                                                       |

|                                |            |                                                                                                                                                                                                                                                                                                                                                                                                                                                                                                                               |
|--------------------------------|------------|-------------------------------------------------------------------------------------------------------------------------------------------------------------------------------------------------------------------------------------------------------------------------------------------------------------------------------------------------------------------------------------------------------------------------------------------------------------------------------------------------------------------------------|
|                                |            | <ul style="list-style-type: none"> <li>- 3+ moderate, 0 severe</li> <li>- Any moderate, 1 severe</li> <li>- Any moderate, 2+ severe</li> </ul> <p>Moderate exacerbation is a record in primary care only; severe exacerbation required secondary care. Methodology has been previously validated**</p>                                                                                                                                                                                                                        |
| <b>MRC dyspnoea score*</b>     | CPRD Aurum | <p>Categorical variable based on the two years prior to index date or three months after index date:</p> <ul style="list-style-type: none"> <li>- Grade 1: no dyspnoea except on strenuous exercise</li> <li>- Grade 2: dyspnoea when walking up a short hill</li> <li>- Grade 3: dyspnoea limits walking pace and participant stops to catch breath</li> <li>- Grade 4: stops to catch breath after walking 100m on level ground</li> <li>- Grade 5: dyspnoea limits leaving home and performing daily activities</li> </ul> |
| <b>GOLD disease severity*</b>  | CPRD Aurum | <p>Categorical variable on lung function (degree of airflow limitation) based on the two years prior to index date or three months after index date:</p> <ul style="list-style-type: none"> <li>- GOLD1: FEV<sub>1</sub> predicted ≥80%</li> <li>- GOLD2: FEV<sub>1</sub> predicted 50% to 80%</li> <li>- GOLD3: FEV<sub>1</sub> predicted 30 to 50%</li> <li>- GOLD4: FEV<sub>1</sub> predicted &lt;30%</li> </ul>                                                                                                           |
| <b>Medication</b>              |            |                                                                                                                                                                                                                                                                                                                                                                                                                                                                                                                               |
| <b>Long-acting medication</b>  | CPRD Aurum | <p>Any record of short-acting inhalers in the year prior to index date:</p> <ul style="list-style-type: none"> <li>- Long-acting beta agonists (LABA)</li> <li>- Long-acting muscarinic antagonists (LAMA)</li> <li>- Combination LABA-LAMA</li> <li>- Inhaled corticosteroids (ICS)</li> <li>- Combination ICS-LABA</li> <li>- Combination ICS-LAMA</li> <li>- Combination ICS-LABA-LAMA (triple therapy)</li> </ul> <p>Combination therapies are fixed and/or open</p>                                                      |
| <b>Short-acting medication</b> | CPRD Aurum | <p>Any record of short-acting inhalers in the year prior to index date:</p> <ul style="list-style-type: none"> <li>- Short-acting beta agonists (SABA)</li> <li>- Short-acting muscarinic antagonists (SAMA)</li> <li>- Combination SABA-SAMA</li> </ul> <p>Combination therapies are fixed and/or open</p>                                                                                                                                                                                                                   |

**Codelists available at:** <https://github.com/NHLI-Respiratory-Epi/Hospitalisations-MACE-in-COPD>

**Abbreviations:** HES: Hospital Episode Statistics | APC – Admitted Patient Care | CPRD – Clinical Practice Research Datalink | MACE – major adverse cardiovascular events | BMI – body mass index | IMD – Index of Multiple Deprivation | HFpEF – heart failure with preserved ejection fraction | HFrfEF – heart failure with reduced ejection fraction | COPD – chronic obstructive pulmonary disease | MRC – Medical Research Council | GOLD – Global Initiative for Obstructive Lung Disease

**Table E1: Cohort baseline characteristics**

|                                     | Whole                   | No hospitalisation      | Hospitalisations         |                          |                          | Cardiovascular hospitalisations |                        |                       | Respiratory hospitalisations |                         |                       | Non-cardiorespiratory hospitalisations |                         |                          |
|-------------------------------------|-------------------------|-------------------------|--------------------------|--------------------------|--------------------------|---------------------------------|------------------------|-----------------------|------------------------------|-------------------------|-----------------------|----------------------------------------|-------------------------|--------------------------|
|                                     |                         |                         | All                      | Emergency                | Elective                 | All                             | Emergency              | Elective              | All                          | Emergency               | Elective              | All                                    | Emergency               | Elective                 |
| <b>N (%)</b>                        | <b>312,121</b><br>{100} | <b>73,290</b><br>{23.5} | <b>238,831</b><br>{76.5} | <b>116,469</b><br>{37.3} | <b>122,362</b><br>{39.2} | <b>24,560</b><br>{7.9}          | <b>15,869</b><br>{5.1} | <b>8,691</b><br>{2.9} | <b>45,827</b><br>{14.7}      | <b>41,807</b><br>{13.4} | <b>4,020</b><br>{1.3} | <b>168,444</b><br>{54.0}               | <b>58,793</b><br>{18.9} | <b>109,651</b><br>{35.1} |
| <b>Mean age<sup>1,2</sup> (SD)</b>  | 69.0<br>(11.3)          | 64.1<br>(11.3)          | 70.5<br>(10.9)           | 71.7<br>(11.5)           | 69.4<br>(10.2)           | 71.9<br>(10.1)                  | 73.3<br>(10.3)         | 69.5<br>(9.3)         | 71.1<br>(11.3)               | 71.5<br>(11.3)          | 66.6<br>(10.4)        | 70.2<br>(10.9)                         | 71.5<br>(11.8)          | 69.5<br>(10.3)           |
| <b>Sex<sup>1,2</sup></b>            |                         |                         |                          |                          |                          |                                 |                        |                       |                              |                         |                       |                                        |                         |                          |
| <i>Male</i>                         | 167,178<br>(53.6)       | 39,356<br>(53.7)        | 127,822<br>(53.5)        | 61,318<br>(52.7)         | 66,504<br>(54.4)         | 15,408<br>(62.7)                | 9,588<br>(60.4)        | 5,820<br>(67.0)       | 22,243<br>(50.7)             | 20,958<br>(50.1)        | 2,285<br>(56.8)       | 89,171<br>(52.9)                       | 30,772<br>(52.3)        | 58,399<br>(53.3)         |
| <i>Female</i>                       | 144,943<br>(46.4)       | 33,934<br>(46.3)        | 111,009<br>(46.5)        | 55,151<br>(47.4)         | 55,858<br>(45.7)         | 9,152<br>(37.3)                 | 6,281<br>(39.6)        | 2,871<br>(33.0)       | 22,584<br>(49.3)             | 20,849<br>(49.9)        | 1,735<br>(43.2)       | 79,273<br>(47.1)                       | 28,021<br>(47.7)        | 51,252<br>(46.7)         |
| <b>Smoking status<sup>1,2</sup></b> |                         |                         |                          |                          |                          |                                 |                        |                       |                              |                         |                       |                                        |                         |                          |
| <i>Ex</i>                           | 150,024<br>(48.1)       | 31,449<br>(42.9)        | 118,575<br>(49.7)        | 56,489<br>(48.5)         | 42,086<br>(50.7)         | 12,868<br>(52.4)                | 8,181<br>(51.6)        | 4,687<br>(53.9)       | 21,707<br>(47.4)             | 19,707<br>(47.1)        | 2,000<br>(49.8)       | 84,000<br>(49.9)                       | 28,601<br>(48.7)        | 55,399<br>(50.5)         |
| <i>Current</i>                      | 162,097<br>(51.9)       | 41,841<br>(57.1)        | 120,256<br>(50.4)        | 59,980<br>(51.5)         | 60,276<br>(49.3)         | 11,692<br>(47.6)                | 7,688<br>(48.5)        | 4,004<br>(46.1)       | 24,120<br>(52.6)             | 22,100<br>(52.9)        | 2,020<br>(50.3)       | 84,444<br>(50.1)                       | 30,192<br>(51.4)        | 54,252<br>(49.5)         |
| <b>BMI<sup>2</sup></b>              |                         |                         |                          |                          |                          |                                 |                        |                       |                              |                         |                       |                                        |                         |                          |
| <i>Healthy weight</i>               | 93,213<br>(29.9)        | 20,619<br>(28.1)        | 72,594<br>(30.4)         | 36,352<br>(31.2)         | 36,242<br>(29.6)         | 6,529<br>(26.6)                 | 4,329<br>(27.3)        | 2,200<br>(25.3)       | 15,018<br>(32.8)             | 13,760<br>(32.9)        | 1,258<br>(31.3)       | 51,047<br>(30.3)                       | 18,263<br>(31.1)        | 32,784<br>(29.9)         |
| <i>Underweight</i>                  | 14,322<br>(4.5)         | 2,685<br>(3.7)          | 11,637<br>(4.9)          | 7,319<br>(6.3)           | 4,318<br>(3.5)           | 786<br>(3.2)                    | 576<br>(3.6)           | 210<br>(2.4)          | 3,809<br>(8.3)               | 3,608<br>(8.6)          | 201<br>(5.0)          | 7,042<br>(4.2)                         | 3,135<br>(5.3)          | 3,907<br>(3.6)           |
| <i>Overweight</i>                   | 93,076<br>(29.8)        | 20,493<br>(28.0)        | 72,583<br>(30.4)         | 32,498<br>(27.9)         | 40,085<br>(32.8)         | 7,979<br>(32.5)                 | 4,948<br>(31.2)        | 3,031<br>(34.9)       | 11,656<br>(25.4)             | 10,418<br>(24.9)        | 1,238<br>(30.8)       | 52,948<br>(31.4)                       | 17,132<br>(29.1)        | 35,816<br>(32.7)         |
| <i>Obese</i>                        | 84,831<br>(27.2)        | 17,935<br>(24.5)        | 66,896<br>(28.0)         | 31,396<br>(27.0)         | 35,500<br>(29.0)         | 7,812<br>(31.8)                 | 5,003<br>(31.5)        | 2,809<br>(32.2)       | 11,105<br>(24.2)             | 10,096<br>(24.2)        | 1,009<br>(25.1)       | 47,979<br>(28.5)                       | 16,297<br>(27.7)        | 31,682<br>(28.9)         |
| <i>Missing</i>                      | 26,679<br>(8.6)         | 11,558<br>(15.8)        | 15,121<br>(6.3)          | 8,904<br>(7.6)           | 6,217<br>(5.1)           | 1,454<br>(5.9)                  | 1,013<br>(6.4)         | 441<br>(5.1)          | 4,239<br>(9.3)               | 3,925<br>(9.4)          | 314<br>(7.8)          | 9,428<br>(5.6)                         | 3,966<br>(6.8)          | 5,462<br>(5.0)           |
| <b>SES (IMD)<sup>1,2</sup></b>      |                         |                         |                          |                          |                          |                                 |                        |                       |                              |                         |                       |                                        |                         |                          |
| 1                                   | 43,460<br>(13.9)        | 10,165<br>(13.8)        | 33,295<br>(13.9)         | 15,068<br>(12.9)         | 18,277<br>(14.9)         | 3,525<br>(14.4)                 | 2,220<br>(14.0)        | 1,305<br>(15.0)       | 5,772<br>(12.6)              | 5,168<br>(12.4)         | 604<br>(15.0)         | 23,998<br>(14.3)                       | 7,680<br>(13.1)         | 16,318<br>(14.9)         |
| 2                                   | 53,989<br>(17.3)        | 12,591<br>(17.2)        | 41,398<br>(17.3)         | 19,269<br>(16.5)         | 22,129<br>(18.1)         | 4,395<br>(17.9)                 | 2,838<br>(17.9)        | 1,557<br>(17.9)       | 7,426<br>(16.2)              | 6,695<br>(16.0)         | 731<br>(18.2)         | 29,577<br>(17.6)                       | 9,736<br>(16.6)         | 19,841<br>(18.1)         |
| 3                                   | 57,437<br>(18.4)        | 13,615<br>(18.6)        | 43,822<br>(18.4)         | 21,087<br>(18.1)         | 22,735<br>(18.6)         | 4,568<br>(18.6)                 | 2,924<br>(18.4)        | 1,644<br>(18.9)       | 8,274<br>(18.1)              | 7,577<br>(18.1)         | 697<br>(17.3)         | 30,980<br>(18.4)                       | 10,586<br>(18.0)        | 20,394<br>(18.6)         |
| 4                                   | 68,815<br>(22.1)        | 16,352<br>(22.3)        | 52,463<br>(22.0)         | 25,878<br>(22.2)         | 26,585<br>(21.7)         | 5,412<br>(22.0)                 | 3,536<br>(22.3)        | 1,876<br>(21.6)       | 10,316<br>(22.5)             | 9,422<br>(22.5)         | 894<br>(22.2)         | 36,735<br>(21.8)                       | 12,920<br>(22.0)        | 23,815<br>(21.7)         |
| 5                                   | 88,211<br>(28.3)        | 20,512<br>(28.0)        | 67,699<br>(28.4)         | 35,082<br>(30.1)         | 32,617<br>(26.7)         | 6,637<br>(27.0)                 | 4,335<br>(27.3)        | 2,302<br>(26.5)       | 14,014<br>(30.6)             | 12,920<br>(30.9)        | 1,094<br>(27.2)       | 47,048<br>(27.9)                       | 17,827<br>(30.3)        | 29,221<br>(26.7)         |
| <i>Missing</i>                      | 209<br>(0.1)            | 55<br>(0.1)             | 154<br>(0.1)             | 85<br>(0.1)              | 69<br>(0.1)              | 23<br>(0.1)                     | 16<br>(0.1)            | 7<br>(0.1)            | 25<br>(0.1)                  | 25<br>(0.1)             | 0<br>(0.0)            | 106<br>(0.1)                           | 44<br>(0.1)             | 62<br>(0.1)              |
| <b>Depression<sup>1,2</sup></b>     | 84,481<br>(27.1)        | 19,679<br>(26.9)        | 64,802<br>(27.1)         | 31,859<br>(27.4)         | 32,943<br>(26.9)         | 5,718<br>(23.3)                 | 3,643<br>(23.0)        | 2,075<br>(23.9)       | 12,335<br>(26.9)             | 17,006<br>(28.9)        | 29,743<br>(27.1)      | 46,749<br>(27.8)                       | 11,210<br>(26.8)        | 1,125<br>(28.0)          |

|                                         |                   |                  |                   |                  |                  |                  |                  |                 |                  |                  |                 |                   |                  |                  |
|-----------------------------------------|-------------------|------------------|-------------------|------------------|------------------|------------------|------------------|-----------------|------------------|------------------|-----------------|-------------------|------------------|------------------|
| <b>Anxiety<sup>1,2</sup></b>            | 73,937<br>(23.7)  | 16,886<br>(23.0) | 57,051<br>(23.9)  | 28,416<br>(24.4) | 28,635<br>(23.4) | 5,075<br>(20.7)  | 3,320<br>(20.9)  | 1,755<br>(20.2) | 10,920<br>(23.8) | 9,992<br>(23.9)  | 928<br>(23.1)   | 41,056<br>(24.4)  | 15,104<br>(25.7) | 25,952<br>(23.7) |
| <b>GORD<sup>1,2</sup></b>               | 55,993<br>(17.0)  | 9,547<br>(13.0)  | 43,446<br>(18.2)  | 19,263<br>(16.5) | 24,183<br>(19.8) | 4,282<br>(17.4)  | 2,662<br>(16.8)  | 1,620<br>(18.6) | 6,807<br>(14.9)  | 6,057<br>(14.5)  | 750<br>(18.7)   | 32,357<br>(19.2)  | 10,544<br>(17.9) | 21,813<br>(19.9) |
| <b>Lung cancer<sup>1,2</sup></b>        | 4,750<br>(1.5)    | 457<br>(0.6)     | 4,293<br>(1.8)    | 2,091<br>(1.8)   | 2,202<br>(1.8)   | 222<br>(0.9)     | 170<br>(1.1)     | 52<br>(0.6)     | 824<br>(1.8)     | 721<br>(1.7)     | 103<br>(2.6)    | 3,247<br>(1.9)    | 1,200<br>(2.0)   | 2,047<br>(1.9)   |
| <b>Hypertension<sup>1,2</sup></b>       | 151,111<br>(48.4) | 27,887<br>(38.1) | 123,224<br>(51.6) | 61,591<br>(52.9) | 61,633<br>(50.4) | 14,629<br>(59.6) | 9,541<br>(60.1)  | 5,088<br>(58.4) | 22,375<br>(48.8) | 20,669<br>(49.4) | 1,706<br>(42.4) | 86,220<br>(51.2)  | 31,381<br>(53.4) | 54,839<br>(50.0) |
| <b>Diabetes (type 2)<sup>1,2</sup></b>  | 56,175<br>(18.0)  | 9,203<br>(12.6)  | 46,972<br>(19.7)  | 24,177<br>(20.8) | 22,795<br>(18.6) | 5,931<br>(24.2)  | 3,912<br>(24.7)  | 2,019<br>(23.2) | 8,463<br>(18.5)  | 7,875<br>(18.8)  | 588<br>(14.6)   | 32,578<br>(19.3)  | 12,390<br>(21.1) | 20,188<br>(18.4) |
| <b>CV history<sup>1,2</sup></b>         | 74,995<br>(24.0)  | 7,629<br>(10.4)  | 67,366<br>(28.2)  | 45,117<br>(38.7) | 22,249<br>(18.2) | 15,307<br>(62.3) | 12,182<br>(76.8) | 3,125<br>(36.0) | 14,246<br>(31.1) | 13,568<br>(32.5) | 678<br>(16.9)   | 37,813<br>(22.5)  | 19,367<br>(32.9) | 18,446<br>(16.8) |
| <b>Asthma<sup>1,2</sup></b>             | 85,711<br>(27.5)  | 16,880<br>(23.0) | 68,831<br>(28.8)  | 33,504<br>(28.8) | 35,327<br>(28.9) | 6,139<br>(25.0)  | 4,005<br>(25.2)  | 2,134<br>(24.6) | 14,112<br>(30.8) | 12,875<br>(30.8) | 1,237<br>(30.8) | 48,580<br>(28.8)  | 16,624<br>(28.3) | 31,956<br>(29.1) |
| <b>Exacerbation group<sup>1,2</sup></b> |                   |                  |                   |                  |                  |                  |                  |                 |                  |                  |                 |                   |                  |                  |
| None                                    | 191,495<br>(61.4) | 52,740<br>(72.0) | 138,755<br>(58.1) | 52,094<br>(44.7) | 86,661<br>(70.8) | 15,584<br>(63.5) | 9,356<br>(59.0)  | 6,228<br>(71.7) | 8,113<br>(17.7)  | 5,747<br>(13.8)  | 2,366<br>(58.9) | 115,058<br>(68.3) | 36,991<br>(62.9) | 78,067<br>(71.2) |
| 1 moderate, 0 severe                    | 48,243<br>(15.5)  | 12,062<br>(16.5) | 36,181<br>(15.2)  | 14,524<br>(12.5) | 21,657<br>(17.7) | 3,940<br>(16.0)  | 2,494<br>(15.7)  | 1,446<br>(16.6) | 3,132<br>(6.8)   | 2,349<br>(5.6)   | 783<br>(19.5)   | 29,109<br>(17.3)  | 9,681<br>(16.5)  | 19,428<br>(17.7) |
| 2 moderate, 0 severe                    | 14,464<br>(4.6)   | 3,369<br>(4.6)   | 11,095<br>(4.7)   | 4,549<br>(3.9)   | 6,546<br>(5.4)   | 1,205<br>(4.9)   | 786<br>(5.0)     | 419<br>(4.8)    | 1,086<br>(2.4)   | 819<br>(2.0)     | 267<br>(6.6)    | 8,804<br>(5.2)    | 2,944<br>(5.0)   | 5,860<br>(5.3)   |
| 3+ moderate, 0 severe                   | 7,540<br>(2.4)    | 1,449<br>(2.0)   | 6,091<br>(2.6)    | 2,651<br>(2.3)   | 3,440<br>(2.8)   | 640<br>(2.6)     | 436<br>(2.8)     | 204<br>(2.4)    | 707<br>(1.5)     | 541<br>(1.3)     | 166<br>(4.1)    | 4,744<br>(2.8)    | 1,674<br>(2.9)   | 3,070<br>(2.8)   |
| Any moderate, 1 severe                  | 44,980<br>(14.4)  | 3,337<br>(4.6)   | 41,645<br>(17.4)  | 38,061<br>(32.7) | 3,584<br>(2.9)   | 2,898<br>(11.8)  | 2,546<br>(16.0)  | 352<br>(4.1)    | 29,239<br>(63.8) | 28,868<br>(69.1) | 371<br>(9.2)    | 9,508<br>(5.6)    | 6,647<br>(11.3)  | 2,861<br>(2.6)   |
| Any moderate, 2+ severe                 | 5,397<br>(1.7)    | 333<br>(0.5)     | 5,064<br>(2.1)    | 4,590<br>(3.9)   | 474<br>(0.4)     | 293<br>(1.2)     | 251<br>(1.6)     | 42<br>(0.5)     | 3,550<br>(7.8)   | 3,483<br>(8.3)   | 67<br>(1.7)     | 1,221<br>(0.7)    | 856<br>(1.5)     | 365<br>(0.3)     |
| <b>MRC dyspnoea score<sup>2</sup></b>   |                   |                  |                   |                  |                  |                  |                  |                 |                  |                  |                 |                   |                  |                  |
| 1                                       | 38,518<br>(12.3)  | 4,524<br>(6.2)   | 33,994<br>(14.2)  | 12,551<br>(10.8) | 21,443<br>(17.5) | 3,243<br>(13.2)  | 1,928<br>(12.2)  | 1,315<br>(15.1) | 3,504<br>(7.7)   | 2,933<br>(7.0)   | 571<br>(14.2)   | 27,247<br>(16.2)  | 7,690<br>(13.1)  | 19,557<br>(17.8) |
| 2                                       | 82,877<br>(26.6)  | 7,094<br>(9.7)   | 75,783<br>(31.7)  | 31,691<br>(27.2) | 44,092<br>(36.0) | 7,724<br>(31.5)  | 4,764<br>(30.0)  | 2,960<br>(34.1) | 10,345<br>(22.6) | 9,115<br>(21.8)  | 1,230<br>(30.6) | 57,714<br>(34.3)  | 17,812<br>(30.3) | 39,902<br>(36.4) |
| 3                                       | 57,717<br>(18.5)  | 3,535<br>(4.8)   | 54,182<br>(22.7)  | 27,602<br>(23.7) | 26,580<br>(21.7) | 5,829<br>(23.7)  | 3,872<br>(24.4)  | 1,957<br>(22.5) | 10,397<br>(22.7) | 9,568<br>(22.9)  | 829<br>(20.6)   | 37,956<br>(22.5)  | 14,162<br>(24.1) | 23,794<br>(21.7) |
| 4                                       | 30,395<br>(9.7)   | 1,569<br>(2.1)   | 28,826<br>(12.1)  | 17,813<br>(15.3) | 11,013<br>(9.0)  | 3,076<br>(12.5)  | 2,216<br>(14.0)  | 860<br>(9.9)    | 8,190<br>(17.9)  | 7,717<br>(18.5)  | 473<br>(11.8)   | 17,560<br>(10.4)  | 7,880<br>(13.4)  | 9,680<br>(8.8)   |
| 5                                       | 6,593<br>(2.1)    | 323<br>(0.4)     | 6,270<br>(2.6)    | 4,579<br>(3.9)   | 1,691<br>(1.4)   | 549<br>(2.2)     | 448<br>(2.8)     | 101<br>(1.2)    | 2,520<br>(5.5)   | 2,420<br>(5.8)   | 100<br>(2.5)    | 3,201<br>(1.9)    | 1,711<br>(2.9)   | 1,490<br>(1.4)   |
| Missing                                 | 96,021<br>(30.8)  | 56,245<br>(76.7) | 39,776<br>(16.7)  | 22,233<br>(19.1) | 17,543<br>(14.3) | 4,139<br>(16.9)  | 2,641<br>(16.6)  | 1,498<br>(17.2) | 10,871<br>(23.7) | 10,054<br>(24.1) | 817<br>(20.3)   | 24,766<br>(14.7)  | 9,538<br>(16.2)  | 15,228<br>(13.9) |
| <b>GOLD<sup>2</sup></b>                 |                   |                  |                   |                  |                  |                  |                  |                 |                  |                  |                 |                   |                  |                  |
| Mild                                    | 71,438<br>(22.9)  | 18,624<br>(25.4) | 52,814<br>(22.1)  | 20,577<br>(17.7) | 32,237<br>(26.4) | 5,202<br>(21.2)  | 3,093<br>(19.5)  | 2,109<br>(24.3) | 5,785<br>(12.6)  | 4,969<br>(11.9)  | 816<br>(20.3)   | 41,827<br>(24.8)  | 12,515<br>(21.3) | 29,312<br>(26.7) |
| Moderate                                | 127,674<br>(40.9) | 31,706<br>(43.3) | 95,968<br>(40.2)  | 41,810<br>(35.9) | 54,158<br>(44.3) | 10,413<br>(42.4) | 6,458<br>(40.7)  | 3,955<br>(45.5) | 13,636<br>(29.8) | 11,991<br>(28.7) | 1,645<br>(40.9) | 71,919<br>(42.7)  | 23,361<br>(39.7) | 48,558<br>(44.3) |
| Severe                                  | 49,287            | 9,384            | 39,903            | 22,607           | 17,296           | 3,896            | 2,730            | 1,166           | 11,035           | 10,315           | 720             | 24,972            | 9,562            | 15,410           |

|                                              |         |        |         |        |        |        |        |        |        |        |        |         |        |        |
|----------------------------------------------|---------|--------|---------|--------|--------|--------|--------|--------|--------|--------|--------|---------|--------|--------|
|                                              | (15.8)  | (12.8) | (16.7)  | (19.4) | (14.1) | (15.9) | (17.2) | (13.4) | (24.1) | (24.7) | (17.9) | (14.8)  | (16.3) | (14.1) |
| Very severe                                  | 10,497  | 1,462  | 9,035   | 6,431  | 2,604  | 673    | 488    | 185    | 4,327  | 4,146  | 181    | 4,035   | 1,797  | 2,238  |
|                                              | (3.4)   | (2.0)  | (3.8)   | (5.5)  | (2.1)  | (2.7)  | (3.1)  | (2.1)  | (9.4)  | (9.9)  | (4.5)  | (2.4)   | (3.1)  | (2.0)  |
| Missing                                      | 53,225  | 12,114 | 41,111  | 25,044 | 16,067 | 4,376  | 3,100  | 1,276  | 11,044 | 10,386 | 658    | 25,691  | 11,558 | 14,133 |
|                                              | (17.1)  | (16.5) | (17.2)  | (21.5) | (13.1) | (17.8) | (19.5) | (14.7) | (24.1) | (24.8) | (16.4) | (15.3)  | (19.7) | (12.9) |
| <b>Short-acting medication<sup>1,2</sup></b> |         |        |         |        |        |        |        |        |        |        |        |         |        |        |
| None                                         | 69,945  | 20,974 | 48,971  | 21,981 | 26,990 | 5,468  | 3,340  | 2,128  | 7,307  | 6,481  | 826    | 36,196  | 12,160 | 24,036 |
|                                              | (22.4)  | (28.6) | (20.5)  | (18.9) | (22.1) | (22.3) | (21.1) | (24.5) | (15.9) | (15.5) | (20.6) | (21.5)  | (20.7) | (21.9) |
| SAMA                                         | 3,938   | 775    | 3,163   | 1,405  | 1,758  | 358    | 231    | 127    | 423    | 377    | 46     | 2,382   | 797    | 1,585  |
|                                              | (1.3)   | (1.1)  | (1.3)   | (1.2)  | (1.4)  | (1.5)  | (1.5)  | (1.5)  | (0.9)  | (0.9)  | (1.1)  | (1.4)   | (1.4)  | (1.5)  |
| SABA                                         | 220,044 | 49,024 | 171,020 | 84,673 | 86,347 | 17,197 | 11,279 | 5,918  | 34,424 | 31,531 | 2,893  | 119,399 | 41,863 | 77,536 |
|                                              | (70.5)  | (66.9) | (71.6)  | (72.7) | (70.6) | (70.0) | (71.1) | (68.1) | (75.1) | (75.4) | (72.0) | (70.9)  | (71.2) | (70.7) |
| SABA-SAMA                                    | 18,194  | 2,517  | 15,677  | 8,410  | 7,267  | 1,537  | 1,019  | 518    | 1,537  | 3,418  | 255    | 10,467  | 3,973  | 6,494  |
|                                              | (5.8)   | (3.4)  | (6.6)   | (7.2)  | (5.9)  | (6.3)  | (6.4)  | (6.0)  | (6.3)  | (8.2)  | (6.3)  | (6.2)   | (6.8)  | (5.9)  |
| <b>Medication<sup>1,2</sup></b>              |         |        |         |        |        |        |        |        |        |        |        |         |        |        |
| None                                         | 136,369 | 42,167 | 94,202  | 44,146 | 50,056 | 9,972  | 6,343  | 3,629  | 15,696 | 14,268 | 1,428  | 68,534  | 23,535 | 44,999 |
|                                              | (43.7)  | (57.5) | (39.4)  | (37.9) | (40.9) | (40.6) | (40.0) | (41.8) | (34.3) | (34.1) | (35.5) | (40.7)  | (40.0) | (41.0) |
| ICS                                          | 27,342  | 8,518  | 18,824  | 8,595  | 10,229 | 1,983  | 1,273  | 710    | 2,883  | 2,591  | 292    | 13,958  | 4,731  | 9,227  |
| monotherapy                                  | (8.8)   | (11.6) | (7.9)   | (7.4)  | (8.4)  | (8.1)  | (8.0)  | (8.2)  | (6.3)  | (6.2)  | (7.3)  | (8.3)   | (8.1)  | (8.4)  |
| LAMA                                         | 38,307  | 9,288  | 29,019  | 12,981 | 16,038 | 3,321  | 2,078  | 1,243  | 4,083  | 3,636  | 447    | 21,615  | 7,267  | 14,348 |
| monotherapy                                  | (12.3)  | (12.7) | (12.2)  | (11.2) | (13.1) | (13.5) | (13.1) | (14.3) | (8.9)  | (8.7)  | (11.1) | (12.8)  | (12.4) | (13.1) |
| LABA                                         | 6,988   | 1,367  | 5,621   | 2,457  | 3,164  | 661    | 398    | 263    | 756    | 701    | 55     | 4,204   | 1,358  | 2,846  |
| monotherapy                                  | (2.2)   | (1.9)  | (2.4)   | (2.1)  | (2.6)  | (2.7)  | (2.5)  | (3.0)  | (1.7)  | (1.7)  | (1.4)  | (2.5)   | (2.3)  | (2.6)  |
| LABA-LAMA                                    | 12,330  | 2,629  | 9,701   | 4,677  | 5,024  | 1,095  | 700    | 395    | 1,715  | 1,557  | 158    | 6,891   | 2,420  | 4,471  |
|                                              | (4.0)   | (3.6)  | (4.1)   | (4.0)  | (4.1)  | (4.5)  | (4.4)  | (4.5)  | (3.7)  | (3.7)  | (3.9)  | (4.1)   | (4.1)  | (4.1)  |
| ICS-LABA                                     | 4,906   | 924    | 3,982   | 1,889  | 2,093  | 373    | 248    | 125    | 708    | 651    | 57     | 2,901   | 990    | 1,911  |
|                                              | (1.6)   | (1.3)  | (1.7)   | (1.6)  | (1.7)  | (1.5)  | (1.6)  | (1.4)  | (1.5)  | (1.6)  | (1.4)  | (1.7)   | (1.7)  | (1.7)  |
| ICS-LAMA                                     | 6,019   | 1,021  | 4,998   | 2,372  | 2,626  | 536    | 353    | 183    | 821    | 737    | 84     | 3,641   | 1,282  | 2,359  |
|                                              | (1.9)   | (1.4)  | (2.1)   | (2.0)  | (2.2)  | (2.2)  | (2.2)  | (2.1)  | (1.8)  | (1.8)  | (2.1)  | (2.2)   | (2.2)  | (2.2)  |
| Triple therapy                               | 79,860  | 7,376  | 72,484  | 39,352 | 33,132 | 6,619  | 4,476  | 2,143  | 19,165 | 17,666 | 1,499  | 46,700  | 17,210 | 29,490 |
|                                              | (25.6)  | (10.1) | (30.4)  | (33.8) | (27.1) | (27.0) | (28.1) | (24.7) | (41.8) | (42.3) | (37.3) | (27.7)  | (29.3) | (26.9) |

{%} indicates percentage of the study group from the total sample size (N=312,121); (%) indicates percentage of people with the characteristic out of people the study group (N at top of column)

**ABBREVIATIONS:**

BMI = body mass index | Socioeconomic IMD = index of multiple deprivation | GORD = gastro-oesophageal reflux disease | CV = cardiovascular | MRC = Medical Research Council | GOLD = Global Initiative for Obstructive Lung Disease | SABA = short-acting beta agonist | SAMA = short-acting muscarinic antagonist | ICS = inhaled corticosteroids | LABA = long-acting beta agonist | LAMA = long-acting muscarinic antagonist

Covariate definitions: <sup>1</sup> Adjusted for in main statistical models (reported in main manuscript) | <sup>2</sup> Adjusted for in sensitivity analyses (reported in supplementary material)

**COVARIATE DEFINITIONS (more granular detail available in the supplementary material):**

Age, sex, and IMD = provided in CPRD Aurum data or linked data

BMI: most recent record within the last five years, underweight: <18.5kg.m<sup>-2</sup>; healthy weight: 18.5 to 24.9kg.m<sup>-2</sup>; overweight: 25.0 to 29.9kg.m<sup>-2</sup>; obese: >30kg.m<sup>-2</sup>

Covariates defined by any lifetime record prior to start of follow-up: smoking history, depression, anxiety, GORD, lung cancer, hypertension, diabetes, asthma, cardiovascular history

Cardiovascular history: any lifetime record of acute coronary syndrome, heart failure, arrhythmia, or ischaemic stroke; either in primary care or secondary care prior to start of follow-up

COPD exacerbation groups defined in the year preceding follow-up. Severity determined by care level: moderate = primary care record only | severe = secondary care record

MRC dyspnoea score: most recent value between two years before and three months after start of follow-up

GOLD group: determined by spirometry values; the most recent value between two years before and three months after start of follow-up

Medications determined in the year prior to the start of follow-up

**Table E2:** Risk of study outcomes amongst people with COPD who were hospitalised (study exposure group) compared with people who were not hospitalised (study control group) using different models to assess degree of confounding of indication through sensitivity models

| Outcome                                 | Exposure and control groups | N       | N (%)-outcome | Models                |                             |                                                                     |                                                                                   |                                                                                |                                                                                                                             |
|-----------------------------------------|-----------------------------|---------|---------------|-----------------------|-----------------------------|---------------------------------------------------------------------|-----------------------------------------------------------------------------------|--------------------------------------------------------------------------------|-----------------------------------------------------------------------------------------------------------------------------|
|                                         |                             |         |               | Crude                 | Fully adjusted <sup>1</sup> | Doubly robust propensity score adjusted; all variables <sup>1</sup> | Fully adjusted <sup>1</sup> without BMI, GOLD & MRC (Primary model in manuscript) | Doubly robust propensity score adjusted <sup>1</sup> ; without BMI, GOLD & MRC | Fully adjusted <sup>1</sup> without BMI, GOLD & MRC; excluding those with a hospitalisation in the year preceding follow-up |
| <b>MACE</b>                             | <i>Hospitalised</i>         | 238,811 | 11,811 (5.0)  | <b>14.97</b>          | <b>12.23</b>                | <b>12.08</b>                                                        | <b>7.89</b>                                                                       | <b>7.88</b>                                                                    | <b>10.15</b>                                                                                                                |
|                                         | <i>Not hospitalised</i>     | 73,290  | 248 (0.3)     | <b>(13.20, 16.98)</b> | <b>(8.54, 17.52)</b>        | <b>(8.43, 17.30)</b>                                                | <b>(6.95, 8.96)</b>                                                               | <b>(6.93, 8.95)</b>                                                            | <b>(8.46, 12.17)</b>                                                                                                        |
| <b>Mortality: all-cause</b>             | <i>Hospitalised</i>         | 238,811 | 22,183 (9.3)  | <b>3.23</b>           | <b>1.70</b>                 | <b>1.66</b>                                                         | <b>1.80</b>                                                                       | <b>1.71</b>                                                                    | <b>2.39</b>                                                                                                                 |
|                                         | <i>Not hospitalised</i>     | 73,290  | 2,181 (3.0)   | <b>(3.09, 3.37)</b>   | <b>(1.54, 1.87)</b>         | <b>(1.51, 1.83)</b>                                                 | <b>(1.72, 1.89)</b>                                                               | <b>(1.64, 1.79)</b>                                                            | <b>(2.25, 2.55)</b>                                                                                                         |
| <b>Mortality: COPD</b>                  | <i>Hospitalised</i>         | 238,811 | 5,388 (2.3)   | <b>2.77</b>           | 0.83                        | <b>0.80</b>                                                         | 1.06                                                                              | 0.94                                                                           | 1.10                                                                                                                        |
|                                         | <i>Not hospitalised</i>     | 73,290  | 601 (0.8)     | <b>(2.55, 3.01)</b>   | (0.70, 0.99)                | <b>(0.67, 0.95)</b>                                                 | (0.97, 1.16)                                                                      | (0.86, 1.02)                                                                   | (0.97, 1.25)                                                                                                                |
| <b>Mortality: Cardiovascular</b>        | <i>Hospitalised</i>         | 238,811 | 4,349 (1.8)   | <b>1.68</b>           | <b>0.71</b>                 | <b>0.70</b>                                                         | <b>0.80</b>                                                                       | <b>0.77</b>                                                                    | 0.89                                                                                                                        |
|                                         | <i>Not hospitalised</i>     | 73,290  | 799 (1.1)     | <b>(1.56, 1.81)</b>   | <b>(0.61, 0.83)</b>         | <b>(0.60, 0.82)</b>                                                 | <b>(0.74, 0.87)</b>                                                               | <b>(0.71, 0.84)</b>                                                            | (0.79, 0.99)                                                                                                                |
| <b>Mortality: Non-cardiorespiratory</b> | <i>Hospitalised</i>         | 238,811 | 12,446 (5.2)  | <b>5.00</b>           | <b>4.10</b>                 | <b>4.01</b>                                                         | <b>3.52</b>                                                                       | <b>3.38</b>                                                                    | <b>5.75</b>                                                                                                                 |
|                                         | <i>Not hospitalised</i>     | 73,290  | 781 (1.07)    | <b>(4.65, 5.37)</b>   | <b>(3.43, 4.91)</b>         | <b>(3.35, 4.80)</b>                                                 | <b>(3.27, 3.79)</b>                                                               | <b>(3.14, 3.64)</b>                                                            | <b>(5.15, 6.42)</b>                                                                                                         |

<sup>1</sup> **Fully adjusted:** age, sex, smoking status, BMI category (underweight: <18.5kg.m<sup>-2</sup>; healthy weight: 18.5 to 24.9kg.m<sup>-2</sup>; overweight: 25.0 to 29.9kg.m<sup>-2</sup>; obese: >30kg.m<sup>-2</sup>), IMD quintile, COPD exacerbation group (frequency and severity-defined), MRC dyspnoea scale, GOLD airflow obstruction group, short-acting bronchodilators (SABA, SAMA, or SABA-SAMA), COPD medications (ICS, LABA, LAMA, and all combinations thereof), asthma, depression, anxiety, GORD, lung cancer, hypertension, diabetes, and cardiovascular history (lifetime record in either primary or secondary care of acute coronary syndrome, heart failure, arrhythmia, or ischaemic stroke)

**ABBREVIATIONS:**

COPD = chronic obstructive pulmonary disease | BMI = body mass index | Socioeconomic IMD = index of multiple deprivation | GORD = gastro-oesophageal reflux disease | CV = cardiovascular | MRC = Medical Research Council | GOLD = Global Initiative for Obstructive Lung Disease | SABA = short-acting beta agonist | SAMA = short-acting muscarinic antagonist | ICS = inhaled corticosteroids | LABA = long-acting beta agonist | LAMA = long-acting muscarinic antagonist  
Bonferroni corrected at P < 0.0125

**Table E3:** Risk of MACE\* amongst people with COPD who were had an elective or emergency hospitalisation (study exposure groups) compared with people who were not hospitalised (study control group)

|                                              |                                  | <b>N</b> | <b>N (%) -outcome</b> | <b>Primary model<sup>1</sup></b>      | <b>Crude</b>                          | <b>Fully adjusted<sup>2</sup></b>     | <b>Without hospitalisation<sup>3</sup></b> |
|----------------------------------------------|----------------------------------|----------|-----------------------|---------------------------------------|---------------------------------------|---------------------------------------|--------------------------------------------|
| <b>Any hospitalisation cause</b>             | <i>No hospitalisation</i>        | 73,290   | 248 (0.3)             |                                       |                                       |                                       |                                            |
|                                              | <i>Elective hospitalisation</i>  | 122,362  | 4,005 (3.3)           | <b>7.04</b><br><b>(6.19, 8.07)</b>    | <b>9.80</b><br><b>(8.62, 11.15)</b>   | <b>10.95</b><br><b>(7.64, 15.70)</b>  | <b>8.94</b><br><b>(9.69, 14.01)</b>        |
|                                              | <i>Emergency hospitalisation</i> | 116,469  | 7,806 (6.7)           | <b>8.85</b><br><b>(7.78, 10.06)</b>   | <b>20.52</b><br><b>(18.09, 23.29)</b> | <b>13.85</b><br><b>(9.67, 19.86)</b>  | <b>11.65</b><br><b>(9.69, 14.01)</b>       |
| <b>Cardiovascular hospitalisation</b>        | <i>No hospitalisation</i>        | 73,290   | 248 (0.3)             |                                       |                                       |                                       |                                            |
|                                              | <i>Elective hospitalisation</i>  | 8,691    | 824 (9.5)             | <b>17.90</b><br><b>(15.45, 20.74)</b> | <b>29.26</b><br><b>(25.39, 33.73)</b> | <b>29.32</b><br><b>(20.25, 42.46)</b> | <b>24.53</b><br><b>(19.91, 30.23)</b>      |
|                                              | <i>Emergency hospitalisation</i> | 15,869   | 2,493 (15.7)          | <b>19.83</b><br><b>(16.76, 22.40)</b> | <b>50.75</b><br><b>(44.54, 57.83)</b> | <b>31.70</b><br><b>(21.90, 45.89)</b> | <b>26.63</b><br><b>(21.66, 32.75)</b>      |
| <b>Respiratory hospitalisation</b>           | <i>No hospitalisation</i>        | 73,290   | 248 (0.3)             |                                       |                                       |                                       |                                            |
|                                              | <i>Elective hospitalisation</i>  | 4,020    | 123 (3.1)             | <b>6.61</b><br><b>(5.31, 8.22)</b>    | <b>9.15</b><br><b>(7.37, 11.36)</b>   | <b>9.47</b><br><b>(6.19, 14.48)</b>   | <b>8.02</b><br><b>(5.86, 11.52)</b>        |
|                                              | <i>Emergency hospitalisation</i> | 41,807   | 2,332 (5.6)           | <b>7.22</b><br><b>(6.19, 8.43)</b>    | <b>16.96</b><br><b>(14.88, 19.33)</b> | <b>11.19</b><br><b>(7.66, 16.33)</b>  | <b>9.19</b><br><b>(7.33, 11.52)</b>        |
| <b>Non-cardiorespiratory hospitalisation</b> | <i>No hospitalisation</i>        | 73,290   | 248 (0.3)             |                                       |                                       |                                       |                                            |
|                                              | <i>Elective hospitalisation</i>  | 109,651  | 3,058 (2.8)           | <b>6.17</b><br><b>(5.42, 7.03)</b>    | <b>8.34</b><br><b>(7.33, 9.49)</b>    | <b>9.63</b><br><b>(6.72, 13.82)</b>   | <b>7.59</b><br><b>(6.30, 9.15)</b>         |
|                                              | <i>Emergency hospitalisation</i> | 58,793   | 2,981 (5.1)           | <b>7.44</b><br><b>(6.52, 8.49)</b>    | <b>15.39</b><br><b>(13.52, 17.52)</b> | <b>11.35</b><br><b>(7.91, 16.31)</b>  | <b>9.50</b><br><b>(7.86, 11.48)</b>        |

MACE: Major adverse cardiovascular event = acute coronary syndrome, arrhythmia, ischaemic stroke, or heart failure (defined by ICD10 codes)

<sup>1</sup> **This model is presented in the manuscript; Adjusted for:** age, sex, smoking status, IMD quintile, COPD exacerbation group (frequency and severity-defined), short-acting bronchodilators (SABA, SAMA, or SABA-SAMA), COPD medications (ICS, LABA, LAMA, and all combinations thereof), asthma, depression, anxiety, GORD, lung cancer, hypertension, diabetes, and cardiovascular history (lifetime record in either primary or secondary care of acute coronary syndrome, heart failure, arrhythmia, or ischaemic stroke)

<sup>2</sup> **Adjusted for:** all covariates of primary model with the addition of MRC dyspnoea scale, GOLD airflow obstruction group, and BMI category (underweight: <18.5kg.m<sup>-2</sup>; healthy weight: 18.5 to 24.9kg.m<sup>-2</sup>; overweight: 25.0 to 29.9kg.m<sup>-2</sup>; obese: >30kg.m<sup>-2</sup>)

<sup>3</sup> **Adjusted for: all covariates for primary model; excludes all people who had had a record of hospitalisation in the year preceding follow-up**

**Bonferroni corrected at P<0.00625**

**Table E4:** Risk of all-cause mortality amongst people with COPD who were had an elective or emergency hospitalisation (study exposure groups) compared with people who were not hospitalised (study control group)

|                                              |                                  | <b>N</b> | <b>N (%) -outcome</b> | <b>Primary model<sup>1</sup></b>   | <b>Crude</b>                       | <b>Fully adjusted<sup>2</sup></b>  | <b>Without hospitalisation<sup>3</sup></b> |
|----------------------------------------------|----------------------------------|----------|-----------------------|------------------------------------|------------------------------------|------------------------------------|--------------------------------------------|
| <b>Any hospitalisation cause</b>             | <i>No hospitalisation</i>        | 73,290   | 2,181 (3.0)           |                                    |                                    |                                    |                                            |
|                                              | <i>Elective hospitalisation</i>  | 122,362  | 6,511 (5.3)           | <b>1.32</b><br><b>(1.25, 1.38)</b> | <b>1.80</b><br><b>(1.72, 1.89)</b> | <b>1.29</b><br><b>(1.17, 1.42)</b> | <b>1.79</b><br><b>(1.67, 1.91)</b>         |
|                                              | <i>Emergency hospitalisation</i> | 116,469  | 15,672 (13.5)         | <b>2.49</b><br><b>(2.37, 2.61)</b> | <b>4.81</b><br><b>(4.60, 5.03)</b> | <b>2.34</b><br><b>(2.12, 2.58)</b> | <b>3.45</b><br><b>(1.67, 1.91)</b>         |
| <b>Cardiovascular hospitalisation</b>        | <i>No hospitalisation</i>        | 73,290   | 2,181 (3.0)           |                                    |                                    |                                    |                                            |
|                                              | <i>Elective hospitalisation</i>  | 8,691    | 385 (4.4)             | 1.00<br>(0.89, 1.12)               | <b>1.50</b><br><b>(1.34, 1.67)</b> | 1.06<br>(0.91, 1.25)               | 1.17<br>(1.00, 1.37)                       |
|                                              | <i>Emergency hospitalisation</i> | 15,869   | 1,980 (12.5)          | <b>1.62</b><br><b>(1.50, 1.76)</b> | <b>4.43</b><br><b>(4.17, 4.70)</b> | <b>1.84</b><br><b>(1.61, 2.10)</b> | <b>2.24</b><br><b>(1.99, 2.51)</b>         |
| <b>Respiratory hospitalisation</b>           | <i>No hospitalisation</i>        | 73,290   | 2,181 (3.0)           |                                    |                                    |                                    |                                            |
|                                              | <i>Elective hospitalisation</i>  | 4,020    | 320 (8.0)             | <b>1.99</b><br><b>(1.77, 2.24)</b> | <b>2.73</b><br><b>(2.43, 3.07)</b> | <b>1.95</b><br><b>(1.65, 2.30)</b> | <b>2.77</b><br><b>(2.36, 3.25)</b>         |
|                                              | <i>Emergency hospitalisation</i> | 41,807   | 6,141 (14.7)          | <b>1.99</b><br><b>(1.85, 2.14)</b> | <b>5.27</b><br><b>(5.02, 5.53)</b> | <b>2.03</b><br><b>(1.80, 2.30)</b> | <b>3.15</b><br><b>(2.85, 3.49)</b>         |
| <b>Non-cardiorespiratory hospitalisation</b> | <i>No hospitalisation</i>        | 73,290   | 2,181 (3.0)           |                                    |                                    |                                    |                                            |
|                                              | <i>Elective hospitalisation</i>  | 109,651  | 5,806 (5.3)           | <b>1.31</b><br><b>(1.25, 1.38)</b> | <b>1.79</b><br><b>(1.71, 1.88)</b> | <b>1.30</b><br><b>(1.17, 1.43)</b> | <b>1.78</b><br><b>(1.66, 1.91)</b>         |
|                                              | <i>Emergency hospitalisation</i> | 58,793   | 7,551 (12.8)          | <b>2.60</b><br><b>(2.47, 2.73)</b> | <b>4.58</b><br><b>(4.37, 4.81)</b> | <b>2.51</b><br><b>(2.27, 2.78)</b> | <b>3.56</b><br><b>(3.31, 3.82)</b>         |

<sup>1</sup> **This model is presented in the manuscript; Adjusted for:** age, sex, smoking status, IMD quintile, COPD exacerbation group (frequency and severity-defined), short-acting bronchodilators (SABA, SAMA, or SABA-SAMA), COPD medications (ICS, LABA, LAMA, and all combinations thereof), asthma, depression, anxiety, GORD, lung cancer, hypertension, diabetes, and cardiovascular history (lifetime record in either primary or secondary care of acute coronary syndrome, heart failure, arrhythmia, or ischaemic stroke)

<sup>2</sup> **Adjusted for:** all covariates of primary model with the addition of MRC dyspnoea scale, GOLD airflow obstruction group, and BMI category (underweight: <18.5kg.m<sup>-2</sup>; healthy weight: 18.5 to 24.9kg.m<sup>-2</sup>; overweight: 25.0 to 29.9kg.m<sup>-2</sup>; obese: >30kg.m<sup>-2</sup>)

<sup>3</sup> **Adjusted for:** all covariates for primary model; excludes all people who had had a record of hospitalisation in the year preceding follow-up  
Bonferroni corrected at P < 0.00625

**Table E5:** Risk of cardiovascular-specific mortality amongst people with COPD who were had an elective or emergency hospitalisation (study exposure groups) compared with people who were not hospitalised (study control group)

|                                              |                                  | <b>N</b> | <b>N (%) -outcome</b> | <b>Primary model<sup>1</sup></b>   | <b>Crude</b>                       | <b>Fully adjusted<sup>2</sup></b>  | <b>Without hospitalisation<sup>3</sup></b> |
|----------------------------------------------|----------------------------------|----------|-----------------------|------------------------------------|------------------------------------|------------------------------------|--------------------------------------------|
| <b>Any hospitalisation cause</b>             | <i>No hospitalisation</i>        | 73,290   | 799 (1.1)             |                                    |                                    |                                    |                                            |
|                                              | <i>Elective hospitalisation</i>  | 122,362  | 1,084 (0.9)           | <b>0.56</b><br><b>(0.51, 0.61)</b> | <b>0.81</b><br><b>(0.74, 0.89)</b> | <b>0.52</b><br><b>(0.44, 0.61)</b> | <b>0.61</b><br><b>(0.54, 0.69)</b>         |
|                                              | <i>Emergency hospitalisation</i> | 116,469  | 3,265 (2.8)           | 1.08<br><b>(0.99, 1.18)</b>        | <b>2.60</b><br><b>(2.40, 2.81)</b> | 0.96<br><b>(0.82, 1.13)</b>        | <b>1.26</b><br><b>(1.12, 1.41)</b>         |
| <b>Cardiovascular hospitalisation</b>        | <i>No hospitalisation</i>        | 73,290   | 799 (1.09)            |                                    |                                    |                                    |                                            |
|                                              | <i>Elective hospitalisation</i>  | 8,691    | 170 (2.0)             | 1.07<br><b>(0.90, 1.27)</b>        | <b>1.80</b><br><b>(1.53, 2.13)</b> | 1.04<br><b>(0.82, 1.33)</b>        | 1.15<br><b>(0.90, 1.46)</b>                |
|                                              | <i>Emergency hospitalisation</i> | 15,869   | 876 (5.5)             | <b>1.64</b><br><b>(1.45, 1.85)</b> | <b>5.20</b><br><b>(4.72, 5.72)</b> | <b>1.63</b><br><b>(1.32, 2.01)</b> | <b>2.01</b><br><b>(1.69, 2.39)</b>         |
| <b>Respiratory hospitalisation</b>           | <i>No hospitalisation</i>        | 73,290   | 799 (1.1)             |                                    |                                    |                                    |                                            |
|                                              | <i>Elective hospitalisation</i>  | 4,020    | 46 (1.1)              | 0.79<br><b>(0.59, 1.07)</b>        | 1.05<br><b>(0.78, 1.41)</b>        | 0.82<br><b>(0.56, 1.20)</b>        | 0.99<br><b>(0.67, 1.47)</b>                |
|                                              | <i>Emergency hospitalisation</i> | 41,807   | 1,000 (2.4)           | <b>0.78</b><br><b>(0.67, 0.89)</b> | <b>2.21</b><br><b>(2.01, 2.43)</b> | 0.85<br><b>(0.67, 1.08)</b>        | 0.96<br><b>(0.77, 1.21)</b>                |
| <b>Non-cardiorespiratory hospitalisation</b> | <i>No hospitalisation</i>        | 73,290   | 799 (1.1)             |                                    |                                    |                                    |                                            |
|                                              | <i>Elective hospitalisation</i>  | 109,651  | 868 (0.8)             | <b>0.50</b><br><b>(0.45, 0.55)</b> | <b>0.72</b><br><b>(0.66, 0.80)</b> | <b>0.48</b><br><b>(0.40, 0.57)</b> | <b>0.54</b><br><b>(0.47, 0.61)</b>         |
|                                              | <i>Emergency hospitalisation</i> | 58,793   | 1,389 (2.4)           | 0.97<br><b>(89, 1.07)</b>          | <b>2.18</b><br><b>(2.00, 2.38)</b> | 0.88<br><b>(0.75, 1.05)</b>        | 1.07<br><b>(0.94, 1.22)</b>                |

<sup>1</sup> **This model is presented in the manuscript; Adjusted for:** age, sex, smoking status, IMD quintile, COPD exacerbation group (frequency and severity-defined), short-acting bronchodilators (SABA, SAMA, or SABA-SAMA), COPD medications (ICS, LABA, LAMA, and all combinations thereof), asthma, depression, anxiety, GORD, lung cancer, hypertension, diabetes, and cardiovascular history (lifetime record in either primary or secondary care of acute coronary syndrome, heart failure, arrhythmia, or ischaemic stroke)

<sup>2</sup> **Adjusted for:** all covariates of primary model with the addition of MRC dyspnoea scale, GOLD airflow obstruction group, and BMI category (underweight: <18.5kg.m<sup>-2</sup>; healthy weight: 18.5 to 24.9kg.m<sup>-2</sup>; overweight: 25.0 to 29.9kg.m<sup>-2</sup>; obese: >30kg.m<sup>-2</sup>)

<sup>3</sup> **Adjusted for: all covariates for primary model; excludes all people who had had a record of hospitalisation in the year preceding follow-up**  
**Bonferroni corrected at P < 0.00625**

**Table E6:** Risk of COPD-specific mortality amongst people with COPD who were had an elective or emergency hospitalisation (study exposure groups) compared with people who were not hospitalised (study control group)

|                                              |                                  | <b>N</b> | <b>N (%) -outcome</b> | <b>Primary model<sup>1</sup></b>   | <b>Crude</b>                       | <b>Fully adjusted<sup>2</sup></b>  | <b>Without hospitalisation<sup>3</sup></b> |
|----------------------------------------------|----------------------------------|----------|-----------------------|------------------------------------|------------------------------------|------------------------------------|--------------------------------------------|
| <b>Any hospitalisation cause</b>             | <i>No hospitalisation</i>        | 73,290   | 601 (0.8)             |                                    |                                    |                                    |                                            |
|                                              | <i>Elective hospitalisation</i>  | 122,362  | 843 (0.7)             | <b>0.58</b><br><b>(0.53, 0.65)</b> | <b>0.84</b><br><b>(0.76, 0.93)</b> | <b>0.54</b><br><b>(0.45, 0.65)</b> | <b>0.64</b><br><b>(0.55, 0.74)</b>         |
|                                              | <i>Emergency hospitalisation</i> | 116,469  | 4,545 (3.9)           | <b>1.53</b><br><b>(1.39, 1.67)</b> | <b>4.84</b><br><b>(4.44, 5.27)</b> | 1.13<br>(0.95, 1.35)               | <b>1.79</b><br><b>(1.56, 2.05)</b>         |
| <b>Cardiovascular hospitalisation</b>        | <i>No hospitalisation</i>        | 73,290   | 601 (0.8)             |                                    |                                    |                                    |                                            |
|                                              | <i>Elective hospitalisation</i>  | 8,691    | 391 (2.5)             | <b>0.53</b><br><b>(0.40, 0.70)</b> | 0.80<br>(0.61, 1.05)               | <b>0.57</b><br><b>(0.40, 0.82)</b> | <b>0.51</b><br><b>(0.34, 0.76)</b>         |
|                                              | <i>Emergency hospitalisation</i> | 15,869   | 57 (0.7)              | 0.94<br>(0.80, 1.11)               | <b>3.03</b><br><b>(2.67, 3.44)</b> | 0.99<br>(0.76, 1.30)               | 1.08<br>(0.84, 1.39)                       |
| <b>Respiratory hospitalisation</b>           | <i>No hospitalisation</i>        | 73,290   | 601 (0.8)             |                                    |                                    |                                    |                                            |
|                                              | <i>Elective hospitalisation</i>  | 4,020    | 58 (1.4)              | 1.11<br>(0.85, 1.46)               | <b>1.76</b><br><b>(1.35, 2.31)</b> | 0.95<br>(0.67, 1.36)               | 1.27<br>(0.85, 1.89)                       |
|                                              | <i>Emergency hospitalisation</i> | 41,807   | 2,756 (6.6)           | <b>2.01</b><br><b>(1.77, 2.27)</b> | <b>8.29</b><br><b>(7.59, 9.05)</b> | <b>1.62</b><br><b>(1.32, 2.00)</b> | <b>3.25</b><br><b>(2.71, 3.91)</b>         |
| <b>Non-cardiorespiratory hospitalisation</b> | <i>No hospitalisation</i>        | 73,290   | 601 (0.8)             |                                    |                                    |                                    |                                            |
|                                              | <i>Elective hospitalisation</i>  | 109,651  | 728 (0.7)             | <b>0.53</b><br><b>(0.45, 0.59)</b> | <b>0.81</b><br><b>(0.73, 0.90)</b> | <b>0.52</b><br><b>(0.43, 0.62)</b> | <b>0.56</b><br><b>(0.48, 0.66)</b>         |
|                                              | <i>Emergency hospitalisation</i> | 58,793   | 1,398 (2.4)           | 1.17<br>(1.05, 1.29)               | <b>2.92</b><br><b>(2.66, 3.22)</b> | 0.95<br>(0.79, 1.14)               | <b>1.34</b><br><b>(1.15, 1.56)</b>         |

<sup>1</sup> **This model is presented in the manuscript; Adjusted for:** age, sex, smoking status, IMD quintile, COPD exacerbation group (frequency and severity-defined), short-acting bronchodilators (SABA, SAMA, or SABA-SAMA), COPD medications (ICS, LABA, LAMA, and all combinations thereof), asthma, depression, anxiety, GORD, lung cancer, hypertension, diabetes, and cardiovascular history (lifetime record in either primary or secondary care of acute coronary syndrome, heart failure, arrhythmia, or ischaemic stroke)

<sup>2</sup> **Adjusted for:** all covariates of primary model with the addition of MRC dyspnoea scale, GOLD airflow obstruction group, and BMI category (underweight: <18.5kg.m<sup>-2</sup>; healthy weight: 18.5 to 24.9kg.m<sup>-2</sup>; overweight: 25.0 to 29.9kg.m<sup>-2</sup>; obese: >30kg.m<sup>-2</sup>)

<sup>3</sup> **Adjusted for:** all covariates for primary model; excludes all people who had had a record of hospitalisation in the year preceding follow-up Bonferroni corrected at P < 0.00625

**Table E7:** Descriptive statistics and rates of major adverse cardiovascular events (MACE) in people with COPD by hospitalisation group (not hospitalised; and hospitalised, stratified by hospitalisation type [emergency or elective] and cause [respiratory, cardiovascular, and non-cardiorespiratory])

|                                                                  | <b>N</b>       | <b>Median (IQR)<br/>follow up time<br/>(years)</b> | <b>Absolute<br/>events per year<br/>N (%)*</b> | <b>Person-<br/>years</b> | <b>Incidence rate<br/>(95%CI) (events<br/>per 1000 person-<br/>years)</b> |
|------------------------------------------------------------------|----------------|----------------------------------------------------|------------------------------------------------|--------------------------|---------------------------------------------------------------------------|
| <b>WHOLE COHORT</b>                                              | <b>312,121</b> | <b>1<br/>(1 to 1)</b>                              | <b>12,059 (3.9)</b>                            | <b>304,888.9</b>         | <b>39.6<br/>(38.9, 40.3)</b>                                              |
| Not hospitalised                                                 | 73,290         | 1<br>(1 to 1)                                      | 248 (0.3)                                      | 73,183.3                 | 3.4<br>(3.0, 3.8)                                                         |
| Hospitalisation (any)                                            | 238,831        | 1<br>(1 to 1)                                      | 11,881 (5.0)                                   | 213,705.7                | 51.0<br>(50.1, 51.9)                                                      |
| <i>Hospitalisation<br/>(elective)</i>                            | 122,362        | 1<br>(1 to 1)                                      | 4,005 (3.3)                                    | 120190.0                 | 33.3<br>(32.3, 34.4)                                                      |
| <i>Hospitalisation<br/>(emergency)</i>                           | 116,469        | 1<br>(1 to 1)                                      | 7,806 (6.7)                                    | 111,515.6                | 70.0<br>(68.4, 71.6)                                                      |
| Cardiovascular<br>hospitalisation (any)                          | 24,560         | 1<br>(1 to 1)                                      | 3,317 (13.5)                                   | 22,328.0                 | 148.6<br>(143.6, 153.7)                                                   |
| <i>Cardiovascular<br/>hospitalisation<br/>(elective)</i>         | 8,691          | 1<br>(1 to 1)                                      | 824 (9.5)                                      | 8,185.1                  | 100.7<br>(94.0, 107.8)                                                    |
| <i>Cardiovascular<br/>hospitalisation<br/>(emergency)</i>        | 15,869         | 1<br>(1 to 1)                                      | 2,493 (15.7)                                   | 14,142.9                 | 176.3<br>(169.5, 183.3)                                                   |
| Respiratory<br>hospitalisation (any)                             | 45,827         | 1<br>(1 to 1)                                      | 2,455 (5.4)                                    | 44,330.0                 | 55.4<br>(53.2, 57.6)                                                      |
| <i>Respiratory<br/>hospitalisation<br/>(elective)</i>            | 4,020          | 1<br>(1 to 1)                                      | 123 (3.1)                                      | 3,957.3                  | 31.1<br>(26.0, 37.1)                                                      |
| <i>Respiratory<br/>hospitalisation<br/>(emergency)</i>           | 41,807         | 1<br>(1 to 1)                                      | 2,332 (5.6)                                    | 40,372.7                 | 57.8<br>(55.5, 60.1)                                                      |
| Non-cardiorespiratory<br>hospitalisation (any)                   | 168,444        | 1<br>(1 to 1)                                      | 6,039 (3.6)                                    | 165,047.7                | 36.6<br>(35.7, 37.5)                                                      |
| <i>Non-cardiorespiratory<br/>hospitalisation<br/>(elective)</i>  | 109,651        | 1<br>(1 to 1)                                      | 3,058 (2.8)                                    | 108,047.7                | 28.3<br>(27.3, 29.3)                                                      |
| <i>Non-cardiorespiratory<br/>hospitalisation<br/>(emergency)</i> | 58,793         | 1<br>(1 to 1)                                      | 2,981 (5.1)                                    | 57,000.0                 | 52.3<br>(50.5, 54.2)                                                      |

\* The denominator for the absolute event percentages is the study group (N-column)

**Table E8:** Descriptive statistics and rates of all-cause mortality in people with COPD by hospitalisation group (not hospitalised; and hospitalised, stratified by hospitalisation type [emergency or elective] and cause [respiratory, cardiovascular, and non-cardiorespiratory])

|                                                                          | <b>N</b>       | <b>Median (IQR)<br/>follow up<br/>time (years)</b> | <b>Absolute<br/>events per year<br/>N (%)*</b> | <b>Person-time<br/>(person-years)</b> | <b>Incidence rate (95%CI)<br/>(events per 1000<br/>person-years)</b> |
|--------------------------------------------------------------------------|----------------|----------------------------------------------------|------------------------------------------------|---------------------------------------|----------------------------------------------------------------------|
| <b>WHOLE COHORT</b>                                                      | <b>312,121</b> | <b>1<br/>(1 to 1)</b>                              | <b>24,364 (7.8)</b>                            | <b>298,233.9</b>                      | <b>81.7<br/>(80.7, 82.7)</b>                                         |
| Not hospitalised                                                         | 73,290         | 1<br>(1 to 1)                                      | 2,181 (3.0)                                    | 72,087.8                              | 30.3<br>(29.0, 31.6)                                                 |
| Hospitalisation (any)                                                    | 238,831        | 1<br>(1 to 1)                                      | 22,183 (9.3)                                   | 226,146.1                             | 98.1<br>(96.8, 99.4)                                                 |
| <i>Hospitalisation<br/>    (elective)</i>                                | 122,362        | 1<br>(1 to 1)                                      | 6,511 (5.3)                                    | 119,187.9                             | 54.6<br>(53.3, 56.0)                                                 |
| <i>Hospitalisation<br/>    (emergency)</i>                               | 116,469        | 1<br>(1 to 1)                                      | 15,672 (13.5)                                  | 106,958.2                             | 146.5<br>(144.2, 148.8)                                              |
| Cardiovascular<br>hospitalisation (any)                                  | 24,560         | 1<br>(1 to 1)                                      | 2,365 (9.6)                                    | 23,183.8                              | 102.0<br>(98.0, 106.2)                                               |
| <i>Cardiovascular<br/>    hospitalisation<br/>    (elective)</i>         | 8,691          | 1<br>(1 to 1)                                      | 385 (4.4)                                      | 8,497.9                               | 45.3<br>(41.0, 50.1)                                                 |
| <i>Cardiovascular<br/>    hospitalisation<br/>    (emergency)</i>        | 15,869         | 1<br>(1 to 1)                                      | 1,980 (12.5)                                   | 14,686.0                              | 134.8<br>(129.0, 140.9)                                              |
| Respiratory<br>hospitalisation (any)                                     | 45,827         | 1<br>(1 to 1)                                      | 6,461 (14.1)                                   | 41,997.0                              | 153.8<br>(150.1, 157.6)                                              |
| <i>Respiratory<br/>    hospitalisation<br/>    (elective)</i>            | 4,020          | 1<br>(1 to 1)                                      | 320 (8.0)                                      | 3,852.9                               | 83.1<br>(74.4, 92.7)                                                 |
| <i>Respiratory<br/>    hospitalisation<br/>    (emergency)</i>           | 41,807         | 1<br>(1 to 1)                                      | 6,141 (14.7)                                   | 38,144.2                              | 161.0<br>(157.0, 165.1)                                              |
| Non-cardiorespiratory<br>hospitalisation (any)                           | 168,444        | 1<br>(1 to 1)                                      | 13,357 (7.9)                                   | 160,965.3                             | 83.0<br>(81.6, 84.4)                                                 |
| <i>Non-cardiorespiratory<br/>    hospitalisation<br/>    (elective)</i>  | 109,651        | 1<br>(1 to 1)                                      | 5,806 (5.3)                                    | 106,837.1                             | 54.3<br>(53.0, 55.8)                                                 |
| <i>Non-cardiorespiratory<br/>    hospitalisation<br/>    (emergency)</i> | 58,793         | 1<br>(1 to 1)                                      | 7,551 (12.8)                                   | 54,128.1                              | 139.5<br>(136.4, 142.7)                                              |

\* The denominator for the absolute event percentages is the study group (N-column)

**Table E9:** Descriptive statistics and rates of COPD-specific mortality in people with COPD by hospitalisation group (not hospitalised; and hospitalised, stratified by hospitalisation type [emergency or elective] and cause [respiratory, cardiovascular, and non-cardiorespiratory])

|                                                          | <b>N</b>       | <b>Median (IQR) follow up time (years)</b> | <b>Absolute events per year amongst those who died (n = 24,364) N (%)*</b> | <b>Person-time (person-years)</b> | <b>Incidence rate (95%CI) (events per 1000 person-years)**</b> |
|----------------------------------------------------------|----------------|--------------------------------------------|----------------------------------------------------------------------------|-----------------------------------|----------------------------------------------------------------|
| <b>WHOLE COHORT</b>                                      | <b>312,121</b> | <b>1 (1 to 1)</b>                          | <b>5,989 (24.6)</b>                                                        | <b>308,772.7</b>                  | <b>19.4 (18.9, 19.9)</b>                                       |
| Not hospitalised                                         | 73,290         | 1 (1 to 1)                                 | 601 (2.5)                                                                  | 72,951.6                          | 8.2 (7.6, 8.9)                                                 |
| Hospitalisation (any)                                    | 238,831        | 1 (1 to 1)                                 | 5,388 (22.1)                                                               | 235,821.1                         | 22.8 (22.2, 23.5)                                              |
| <i>Hospitalisation (elective)</i>                        | 122,362        | 1 (1 to 1)                                 | 843 (3.5)                                                                  | 121,983.9                         | 6.9 (6.5, 7.4)                                                 |
| <i>Hospitalisation (emergency)</i>                       | 116,469        | 1 (1 to 1)                                 | 4,545 (18.7)                                                               | 113,837.2                         | 39.9 (38.8, 41.1)                                              |
| Cardiovascular hospitalisation (any)                     | 24,560         | 1 (1 to 1)                                 | 448 (1.8)                                                                  | 24,319.4                          | 18.4 (16.8, 20.2)                                              |
| <i>Cardiovascular hospitalisation (elective)</i>         | 8,691          | 1 (1 to 1)                                 | 57 (0.2)                                                                   | 8,664.4                           | 6.6 (5.1, 8.5)                                                 |
| <i>Cardiovascular hospitalisation (emergency)</i>        | 15,869         | 1 (1 to 1)                                 | 391 (1.6)                                                                  | 15,654.9                          | 25.0 (22.6, 27.6)                                              |
| Respiratory hospitalisation (any)                        | 45,827         | 1 (1 to 1)                                 | 2,814 (11.5)                                                               | 44,165.8                          | 63.7 (61.4, 66.1)                                              |
| <i>Respiratory hospitalisation (elective)</i>            | 4,020          | 1 (1 to 1)                                 | 58 (0.2)                                                                   | 3,991.2                           | 14.5 (11.2, 18.8)                                              |
| <i>Respiratory hospitalisation (emergency)</i>           | 41,807         | 1 (1 to 1)                                 | 2,756 (11.3)                                                               | 40,174.6                          | 68.6 (66.1, 71.2)                                              |
| Non-cardiorespiratory hospitalisation (any)              | 168,444        | 1 (1 to 1)                                 | 2,126 (8.7)                                                                | 167,335.9                         | 12.7 (12.2, 13.3)                                              |
| <i>Non-cardiorespiratory hospitalisation (elective)</i>  | 109,651        | 1 (1 to 1)                                 | 728 (3.0)                                                                  | 109,328.3                         | 6.7 (6.2, 7.2)                                                 |
| <i>Non-cardiorespiratory hospitalisation (emergency)</i> | 58,793         | 1 (1 to 1)                                 | 1,398 (5.7)                                                                | 58,007.7                          | 24.1 (22.9, 25.4)                                              |

\*The denominator for the absolute event percentages is the people who died of any cause (N = 24,364) across all study groups

\*\* Rates are calculated relative to the whole cohort (to align with the Cox models)

**Table E10:** Descriptive statistics and rates of cardiovascular disease-specific mortality in people with COPD by hospitalisation group (not hospitalised; and hospitalised, stratified by hospitalisation type [emergency or elective] and cause [respiratory, cardiovascular, and non-cardiorespiratory])

|                                                          | <b>N</b>       | <b>Median (IQR) follow up time (years)</b> | <b>Absolute events per year amongst those who died (n = 24,364) N (%)*</b> | <b>Person-time (person-years)</b> | <b>Incidence rate (95%CI) (events per 1000 person-years)**</b> |
|----------------------------------------------------------|----------------|--------------------------------------------|----------------------------------------------------------------------------|-----------------------------------|----------------------------------------------------------------|
| <b>WHOLE COHORT</b>                                      | <b>312,121</b> | <b>1 (1 to 1)</b>                          | <b>5,148 (21.1)</b>                                                        | <b>309,215.9</b>                  | <b>16.6 (16.2, 17.1)</b>                                       |
| Not hospitalised                                         | 73,290         | 1 (1 to 1)                                 | 799 (3.3)                                                                  | 72,859.5                          | 11.0 (10.2, 11.8)                                              |
| Hospitalisation (any)                                    | 238,831        | 1 (1 to 1)                                 | 4,349 (17.9)                                                               | 236,356.4                         | 18.4 (17.9, 19.0)                                              |
| <i>Hospitalisation (elective)</i>                        | 122,362        | 1 (1 to 1)                                 | 1,084 (4.4)                                                                | 121,836.8                         | 8.9 (8.4, 9.4)                                                 |
| <i>Hospitalisation (emergency)</i>                       | 116,469        | 1 (1 to 1)                                 | 3,265 (13.4)                                                               | 114,519.6                         | 28.5 (27.5, 29.5)                                              |
| Cardiovascular hospitalisation (any)                     | 24,560         | 1 (1 to 1)                                 | 1,046 (4.3)                                                                | 23,910.3                          | 43.7 (41.2, 46.5)                                              |
| <i>Cardiovascular hospitalisation (elective)</i>         | 8,691          | 1 (1 to 1)                                 | 170 (0.7)                                                                  | 8,598.1                           | 19.8 (17.0, 23.0)                                              |
| <i>Cardiovascular hospitalisation (emergency)</i>        | 15,869         | 1 (1 to 1)                                 | 876 (3.6)                                                                  | 15,312.2                          | 57.2 (53.5, 61.1)                                              |
| Respiratory hospitalisation (any)                        | 45,827         | 1 (1 to 1)                                 | 1,046 (4.3)                                                                | 45,214.7                          | 23.1 (21.8, 24.6)                                              |
| <i>Respiratory hospitalisation (elective)</i>            | 4,020          | 1 (1 to 1)                                 | 46 (0.2)                                                                   | 3,998.3                           | 11.5 (8.6, 15.4)                                               |
| <i>Respiratory hospitalisation (emergency)</i>           | 41,807         | 1 (1 to 1)                                 | 1,000 (4.1)                                                                | 41,216.5                          | 24.3 (22.8, 25.8)                                              |
| Non-cardiorespiratory hospitalisation (any)              | 168,444        | 1 (1 to 1)                                 | 2,257 (9.3)                                                                | 167,231.4                         | 13.5 (13.0, 14.1)                                              |
| <i>Non-cardiorespiratory hospitalisation (elective)</i>  | 109,651        | 1 (1 to 1)                                 | 868 (3.6)                                                                  | 109,240.5                         | 7.9 (7.4, 8.5)                                                 |
| <i>Non-cardiorespiratory hospitalisation (emergency)</i> | 58,793         | 1 (1 to 1)                                 | 1,389 (5.7)                                                                | 57,990.9                          | 24.0 (22.7, 25.2)                                              |

\*The denominator for the absolute event percentages is the people who died of any cause (N = 24,364) across all study groups

\*\* Rates are calculated relative to the whole cohort (to align with the Cox models)

**Table E11:** Cause-specific mortality across people with COPD, stratified by hospitalisation cause (any, cardiovascular, respiratory, or non-cardiorespiratory), and sub-stratified by hospitalisation type (all, elective, or emergency), where number (percentages) by ICD10 chapter represent the proportion of people who died in each stratum and/or sub-stratum

| ICD10 chapter                                              | Whole population<br>N (%) | No hospitalisation<br>N (%) | Hospitalisations<br>N (%) |                          |                          | Cardiovascular hospitalisations<br>N (%) |                        |                       | Respiratory hospitalisations<br>N (%) |                         |                       | Non-cardiorespiratory hospitalisations<br>N (%) |                         |                          |
|------------------------------------------------------------|---------------------------|-----------------------------|---------------------------|--------------------------|--------------------------|------------------------------------------|------------------------|-----------------------|---------------------------------------|-------------------------|-----------------------|-------------------------------------------------|-------------------------|--------------------------|
|                                                            |                           |                             | All                       | Emergency                | Elective                 | All                                      | Emergency              | Elective              | All                                   | Emergency               | Elective              | All                                             | Emergency               | Elective                 |
| <b>Whole cohort</b>                                        | <b>312,121</b><br>{100}   | <b>73,290</b><br>{23.5}     | <b>238,831</b><br>{76.5}  | <b>116,469</b><br>{37.3} | <b>122,362</b><br>{39.2} | <b>24,560</b><br>{7.9}                   | <b>15,869</b><br>{5.1} | <b>8,691</b><br>{2.9} | <b>45,827</b><br>{14.7}               | <b>41,807</b><br>{13.4} | <b>4,020</b><br>{1.3} | <b>168,444</b><br>{54.0}                        | <b>58,793</b><br>{18.9} | <b>109,651</b><br>{35.1} |
| <b>Any death</b>                                           | 24,364<br>[7.8]           | 2,181<br>[3.0]              | 22,183<br>[9.3]           | 15,672<br>[13.5]         | 6,511<br>[5.3]           | 2,365<br>[9.6]                           | 1,980<br>[12.5]        | 385<br>[4.4]          | 6,461<br>[14.1]                       | 6,141<br>[14.7]         | 320<br>[8.0]          | 13,357<br>[7.9]                                 | 7,551<br>[12.8]         | 5,806<br>[5.3]           |
| <b>Cause specific death<sup>1</sup></b>                    |                           |                             |                           |                          |                          |                                          |                        |                       |                                       |                         |                       |                                                 |                         |                          |
| <i>I: Infectious and parasitic diseases</i>                | 191<br>(0.8)              | 7<br>(0.3)                  | 184<br>(0.8)              | 132<br>(0.8)             | 52<br>(0.8)              | 25<br>(1.1)                              | 22<br>(1.1)            | 3<br>(0.8)            | 51<br>(0.8)                           | 45<br>(0.7)             | 6<br>(1.9)            | 108<br>(0.8)                                    | 65<br>(0.9)             | 43<br>(0.7)              |
| <i>II: Neoplasms</i>                                       | 8,582<br>(35.3)           | 373<br>(17.3)               | 8,209<br>(37.1)           | 4,578<br>(29.3)          | 3,631<br>(55.9)          | 394<br>(16.7)                            | 327<br>(16.6)          | 67<br>(17.5)          | 1,362<br>(21.1)                       | 1,205<br>(19.7)         | 157<br>(49.1)         | 6,453<br>(48.4)                                 | 3,046<br>(40.4)         | 3,407<br>(58.8)          |
| <i>III: Blood, blood-forming organs, immune mechanisms</i> | 29<br>(0.1)               | 1<br>(0.1)                  | 28<br>(0.1)               | 16<br>(0.1)              | 12<br>(0.2)              | 2<br>(0.1)                               | 2<br>(0.1)             | 0<br>(0.0)            | 6<br>(0.1)                            | 6<br>(0.1)              | 0<br>(0.0)            | 20<br>(0.2)                                     | 8<br>(0.1)              | 12<br>(0.2)              |
| <i>IV: Endocrine, nutritional, metabolic</i>               | 179<br>(0.7)              | 14<br>(0.7)                 | 165<br>(0.8)              | 125<br>(0.8)             | 40<br>(0.6)              | 28<br>(1.2)                              | 24<br>(1.2)            | 4<br>(1.0)            | 39<br>(0.6)                           | 38<br>(0.6)             | 1<br>(0.3)            | 98<br>(0.7)                                     | 63<br>(0.8)             | 35<br>(0.6)              |
| <i>V: Mental and behavioural</i>                           | 415<br>(1.7)              | 27<br>(1.3)                 | 388<br>(1.8)              | 357<br>(2.3)             | 31<br>(0.5)              | 33<br>(1.4)                              | 32<br>(1.6)            | 1<br>(0.3)            | 105<br>(1.6)                          | 103<br>(1.7)            | 2<br>(0.6)            | 250<br>(1.9)                                    | 222<br>(3.0)            | 28<br>(0.5)              |
| <i>VI: Nervous system</i>                                  | 323<br>(1.3)              | 25<br>(1.2)                 | 298<br>(1.4)              | 247<br>(1.6)             | 51<br>(0.8)              | 18<br>(0.8)                              | 17<br>(0.9)            | 1<br>(0.3)            | 87<br>(1.4)                           | 83<br>(1.4)             | 4<br>(1.3)            | 193<br>(1.5)                                    | 147<br>(2.0)            | 46<br>(0.8)              |
| <i>VII: Eye and adnexa</i>                                 | 0<br>(0.0)                | 0<br>(0.0)                  | 0<br>(0.0)                | 0<br>(0.0)               | 0<br>(0.0)               | 0<br>(0.0)                               | 0<br>(0.0)             | 0<br>(0.0)            | 0<br>(0.0)                            | 0<br>(0.0)              | 0<br>(0.0)            | 0<br>(0.0)                                      | 0<br>(0.0)              | 0<br>(0.0)               |
| <i>VIII: Ear and mastoid process</i>                       | 1<br>(0.0)                | 0<br>(0.0)                  | 1<br>(0.0)                | 1<br>(0.0)               | 0<br>(0.0)               | 0<br>(0.0)                               | 1<br>(0.0)             | 0<br>(0.0)            | 0<br>(0.0)                            | 0<br>(0.0)              | 0<br>(0.0)            | 0<br>(0.0)                                      | 0<br>(0.0)              | 0<br>(0.0)               |

|                                                    |                 |               |                 |                 |                 |                 |               |               |                 |                 |              |                 |                 |               |
|----------------------------------------------------|-----------------|---------------|-----------------|-----------------|-----------------|-----------------|---------------|---------------|-----------------|-----------------|--------------|-----------------|-----------------|---------------|
| <i>IX: Circulatory system</i>                      | 5,149<br>(21.2) | 799<br>(37.0) | 4,350<br>(19.7) | 3,266<br>(20.9) | 1,084<br>(16.7) | 1,047<br>(44.5) | 877<br>(44.5) | 170<br>(44.4) | 1,046<br>(16.2) | 1,000<br>(16.3) | 46<br>(14.4) | 2,257<br>(16.9) | 1,389<br>(18.4) | 868<br>(15.0) |
| <i>X: Respiratory system</i>                       | 7,435<br>(30.6) | 735<br>(34.0) | 6,700<br>(30.3) | 5,568<br>(35.6) | 1,132<br>(17.4) | 599<br>(25.4)   | 517<br>(26.2) | 82<br>(21.4)  | 3,330<br>(51.7) | 3,241<br>(52.9) | 89<br>(27.8) | 2,771<br>(20.8) | 1,810<br>(24.0) | 961<br>(16.6) |
| <i>XI: Digestive system</i>                        | 955<br>(3.9)    | 61<br>(2.8)   | 894<br>(4.0)    | 650<br>(4.2)    | 244<br>(3.8)    | 98<br>(4.2)     | 68<br>(3.5)   | 30<br>(7.8)   | 192<br>(3.0)    | 185<br>(3.0)    | 7<br>(2.2)   | 604<br>(4.5)    | 397<br>(5.3)    | 207<br>(3.6)  |
| <i>XII: Skin and subcutaneous tissue</i>           | 64<br>(0.3)     | 5<br>(0.2)    | 59<br>(0.3)     | 47<br>(0.3)     | 12<br>(0.2)     | 11<br>(0.5)     | 9<br>(0.5)    | 2<br>(0.5)    | 15<br>(0.2)     | 15<br>(0.2)     | 0<br>(0.0)   | 33<br>(0.3)     | 23<br>(0.3)     | 10<br>(0.2)   |
| <i>XIII: Musculoskeletal and connective tissue</i> | 104<br>(0.4)    | 11<br>(0.5)   | 93<br>(0.4)     | 69<br>(0.4)     | 24<br>(0.4)     | 9<br>(0.4)      | 7<br>(0.4)    | 2<br>(0.5)    | 26<br>(0.4)     | 25<br>(0.4)     | 1<br>(0.3)   | 58<br>(0.4)     | 37<br>(0.5)     | 21<br>(0.4)   |
| <i>XIV: Genitourinary</i>                          | 300<br>(1.2)    | 14<br>(0.7)   | 286<br>(1.3)    | 224<br>(1.4)    | 62<br>(1.0)     | 37<br>(1.6)     | 28<br>(1.4)   | 9<br>(2.4)    | 63<br>(1.0)     | 62<br>(1.0)     | 1<br>(0.3)   | 186<br>(1.4)    | 134<br>(1.8)    | 52<br>(0.9)   |
| <i>XV: Pregnancy, childbirth, puerperium</i>       | 0<br>(0.0)      | 0<br>(0.0)    | 0<br>(0.0)      | 0<br>(0.0)      | 0<br>(0.0)      | 0<br>(0.0)      | 0<br>(0.0)    | 0<br>(0.0)    | 0<br>(0.0)      | 0<br>(0.0)      | 0<br>(0.0)   | 0<br>(0.0)      | 0<br>(0.0)      | 0<br>(0.0)    |
| <i>XVI: Perinatal conditions</i>                   | 0<br>(0.0)      | 0<br>(0.0)    | 0<br>(0.0)      | 0<br>(0.0)      | 0<br>(0.0)      | 0<br>(0.0)      | 0<br>(0.0)    | 0<br>(0.0)    | 0<br>(0.0)      | 0<br>(0.0)      | 0<br>(0.0)   | 0<br>(0.0)      | 0<br>(0.0)      | 0<br>(0.0)    |
| <i>XVII: Congenital, deformations, chromosomal</i> | 12<br>(0.1)     | 1<br>(0.1)    | 11<br>(0.1)     | 7<br>(0.0)      | 4<br>(0.1)      | 2<br>(0.1)      | 1<br>(0.1)    | 1<br>(0.3)    | 5<br>(0.4)      | 5<br>(0.1)      | 0<br>(0.0)   | 4<br>(0.0)      | 1<br>(0.0)      | 3<br>(0.1)    |
| <i>XVIII: Symptoms, signs</i>                      | 116<br>(0.5)    | 23<br>(1.1)   | 93<br>(0.4)     | 78<br>(0.5)     | 15<br>(0.2)     | 8<br>(0.3)      | 7<br>(0.4)    | 1<br>(0.3)    | 23<br>(0.4)     | 23<br>(0.4)     | 0<br>(0.0)   | 62<br>(0.5)     | 48<br>(0.6)     | 14<br>(0.2)   |
| <i>XIX: Injury, poisoning, other external</i>      | 0<br>(0.0)      | 0<br>(0.0)    | 0<br>(0.0)      | 0<br>(0.0)      | 0<br>(0.0)      | 0<br>(0.0)      | 0<br>(0.0)    | 0<br>(0.0)    | 0<br>(0.0)      | 0<br>(0.0)      | 0<br>(0.0)   | 0<br>(0.0)      | 0<br>(0.0)      | 0<br>(0.0)    |
| <i>XX: External</i>                                | 432<br>(1.8)    | 65<br>(3.0)   | 367<br>(1.7)    | 268<br>(1.7)    | 99<br>(1.5)     | 43<br>(1.8)     | 33<br>(1.7)   | 10<br>(2.6)   | 97<br>(1.5)     | 91<br>(1.5)     | 6<br>(1.9)   | 227<br>(1.7)    | 144<br>(1.9)    | 83<br>(1.4)   |

<sup>1</sup>Defined as the primary cause of death according to Office of National Statistics (ONS) death certification

{%} indicate study group percentage of the total cohort (N=312,121) | [%] are percentages of study group who died | (%) are percentages of those who died by cause of death
